# Supplementary material for: Long-term energy and CO&lt;sub&gt;2&lt;/sub&gt; flux observations over an agricultural field in southeastern Tibetan Plateau
Source: Copernicus journal article supplement (doi:10.5194/acp-2019-1131), 2020-02-03
Supplement: Supplementary file [file acp-2019-1131-AC2-supplement.pdf]

Dear Editor,

We thank the two anonymous reviewers for their invaluable and constructive comments to improve the manuscript. Our point-by-point response to the review comments are listed below as shown in black. Any page and line numbers in our response refer to the revised manuscript.

5

## **Anonymous Referee #2**

The manuscript provides several analysis regarding the behaviour and main controlling factors of H. LE and CO<sub>2</sub> fluxes using more than 10 years. Despite the very relevant and valuable database, the manuscript does not provide any relevant results beyond the analysis of relationships between variables and a visual and statistical description of the behaviour of flows at different time scales. Additionally, regarding the structure of the manuscript, the results section mainly shows several “numbers” that are not easy to follow and the discussion section does not provide any relevant explanation to the behave of the fluxes or their main factors.

**Author’s Response:** We have made more in-depth analysis, discussion and relevant explanation, and improved the manuscript according to your comments. It mainly includes the following aspects.

### **1. We added the representativeness analysis of the study station.**

Over the southeastern extension of the Tibetan Plateau (TP), that is, the transitional zone between the TP and Yunnan-Guizhou Plateau (YGP), there are many basins distributing in mountain valleys. The cropland is the main land-cover type and most residents live in these basins. Dali flux station, surrounded by open and flat agricultural field, is located in the basin between Diancangshan Mountains (DCM) and Yu’anshan Mountains. Erhai Lake, a highland shallow lake, is also located in here (Fig. 1b). This basin is similar to most basins and a typical representative in mountain environment over the southeastern extension of the TP. Furthermore, according to the footprint model analysis proposed by Kormann and Meixner (2001), it can be found that 95 % of source area contributing to the measured fluxes approximately came from 700 m in the southeast direction and 500 m in the northwest direction of the study site during 2007 to 2018 (Fig. 2). Although several roads, trees, buildings and irrigation channels were located in the source area, the underlying surface of source area was primarily covered by croplands, which satisfied the requirement of eddy covariance measurements, implying that the observed fluxes were reliable and mainly contributed by the croplands. Consequently, the flux measurements at this study site could be representative to the atmosphere-land interaction parameters over the transitional region between the TP and YGP.

### **2. We enhanced the analysis and discussion on the diurnal, seasonal, and inter-annual variability in surface energy fluxes.**

It is found that the energy balance components including net radiation, sensible heat, latent heat, and

35 soil heat fluxes all have similar diurnal courses, reaching their maximum values around noon and  
attaining their minimum values around early evening. Turbulent exchanges of energy fluxes are  
greatly influenced by the change of vegetation cover around the flux tower after 2014. The  
magnitudes of annual fluxes present remarkable trends with a large range. It is also found that the  
40 amplitude of LE is obviously larger than that of  $H_s$  throughout the year, which indicates that the LE  
plays a dominant role in surface heat exchange. Through comparative analysis, it is suggested that the  
characteristics of energy exchanges over the Tibetan Plateau, Yunnan-Guizhou Plateau, and their  
transitional zones are similar in the rainy season but obviously different in the dry season.

**3. We enhanced the analysis and discussion on the diurnal, seasonal, and inter-annual variability in CO<sub>2</sub> flux.**

45 It is found that the study area acts as a weak carbon source at night because of plant and soil  
respiration, but acts as a carbon sink during the day thanks to CO<sub>2</sub> uptake from plant photosynthesis  
significantly exceeding CO<sub>2</sub> release through plant and soil respiration. The study area behaves as a  
carbon sink in all years. The annual total  $F_c$  shows distinct jumps in magnitude, rapidly increasing  
after 2014 and varying widely from  $-966.9$  to  $-75.6$  g C m<sup>-2</sup> yr<sup>-1</sup> with an average value of  $-522.0$  g C  
50 m<sup>-2</sup>. This is possibly because of the change of the underlying surface.

**4. We enhanced the discussion and explanation about the relationships between turbulent fluxes of sensible heat, latent heat, and CO<sub>2</sub> and meteorological factors from half-hourly to yearly timescales.**

It is found that the wind speed is the most important controlling factor for sensible heat flux over all  
55 timescales, with their correlation coefficients becoming higher when the timescales becoming longer.  
It is likely caused by the local circulation existing in the Diancangshan Mountains and Erhai Lake,  
which may create more turbulent eddies and could promote the vertical exchange of heat, H<sub>2</sub>O, and  
CO<sub>2</sub> between the atmosphere and cropland. The product of WS and VPD is the main environmental  
variable controlling LE. The effect of WS is not significant as VPD on LE when timescale is below  
60 monthly scale, whereas WS plays a decisive role in affecting LE on yearly scale. The relationship  
between CO<sub>2</sub> flux and meteorological factors are weak on half-hourly scale. The net radiation and  
soil temperature have the largest effects on  $F_c$  from the daily to monthly scales. Similar to sensible  
and latent heat fluxes, wind speed is most significantly related to total CO<sub>2</sub> flux on yearly scale,  
which may be because of the climate effect of local circulation. Overall, the turbulent exchanges of  
65 energy, H<sub>2</sub>O, and CO<sub>2</sub> fluxes are largely influenced by the WS, in particular on the yearly scale. This  
phenomenon is likely caused by the climate effect of local circulation in the complex terrain region.

## 70 References

- Acharya, R. H., Sigdel, M., Ma, Y. M., and Wang, B. B.: Diurnal and seasonal variation of heat fluxes over an agricultural field in southeastern Nepal, *Theor. Appl. Climatol.*, 137, 2949–2960, <https://doi.org/10.1007/s00704-019-02790-3>, 2019.
- Alberto, R. C. M., Wassmann, R., Hirano, T., Miyata, A., Kumar, A., Padre, A., and Amante, M.: CO<sub>2</sub>/heat fluxes in rice fields: comparative assessment of flooded and non-flooded fields in the Philippines, *Agric. For. Meteorol.*, 149, 1737–1750, <https://doi.org/10.1016/j.agrformet.2009.06.003>, 2009.
- Ajao, A. I., Jegede, O. O., and Ayoola, M. A.: Diurnal and seasonal variability of sensible and latent heat fluxes at an agricultural site in Ile-Ife, southwest Nigeria, *Theor. Appl. Climatol.*, 139, 1237–1246, <https://doi.org/10.1007/s00704-019-03043-z>, 2020.
- Baldocchi, D., and Meyers, T.: On using eco-physiological, micrometeorological and biogeochemical theory to evaluate carbon dioxide, water vapor and trace gas fluxes over vegetation: a perspective, *Agric. For. Meteorol.*, 90, 1–25, [https://doi.org/10.1016/S0168-1923\(97\)00072-5](https://doi.org/10.1016/S0168-1923(97)00072-5), 1998.
- Bhattacharyya, P., Neogi, S., Roy, K. S. Dash, P. K., Tripathi, R., and Rao, K. S.: Net ecosystem CO<sub>2</sub> exchange and carbon cycling in tropical lowland flooded rice ecosystem, *Nutr. Cycl. Agroecosystems*, 95, 133–144, <https://doi.org/10.1007/s10705-013-9553-1>, 2013.
- Chen, L. X., Reiter, E. R., and Feng, Z. Q.: The atmospheric heat source over the Tibetan Plateau: May–August 1979, *Mon. Weather Rev.*, 113, 1771–1790, [https://doi.org/10.1175/1520-0493\(1985\)113<1771:TAHSOT>2.0.CO;2](https://doi.org/10.1175/1520-0493(1985)113<1771:TAHSOT>2.0.CO;2), 1985.
- DeFries, R. S., Field, C. B., Fung, I., Justice, C. O., Los, S., Matson, P. A., Matthews, E., Mooney, H. A., Potter, C. S., Prentice, K., Sellers, P. J., Townshend, J. R. G., Tucker, C. J., Ustin, S. L., and Vitousek, P. M.: Mapping the land surface for global atmosphere-biosphere models: toward continuous distributions of vegetation’s functional properties, *J. Geophys. Res.*, 100, 20867–20882, <https://doi.org/10.1029/95JD01536>, 1995.
- Du, Q., Liu, H. Z., Xu, L. J., Liu, Y., and Wang, L.: The monsoon effect on energy and carbon exchange processes over a highland lake in the southwest of China, *Atmos. Chem. Phys.*, 18, 15087–15104, <https://doi.org/10.5194/acp-18-15087-2018>, 2018a.
- Du, Q., Liu, H. Z., Liu, Y., Wang, L., Xu, L. J., Sun, J. H., and Xu, A.L.: Factors controlling evaporation and the CO<sub>2</sub> flux over an open water lake in southwest of China on multiple temporal scales, *Int. J. Climatol.*, 38, 1–17, <https://doi.org/10.1002/joc.5692>, 2018b.
- Falge, E., Baldocchi, D., Olson, R. J., Anthoni, P., Aubinet, M., Bernhofer, C., Burba, G., Ceulemans, R., Clement, R., Dolman, H., Granier, A., Gross, P., Grünwald, T., Hollinger, D., Jensen, N. O., Katul, G., Keronen, P., Kowalski, A., Ta Lai, C., Law, B. E., Meyers, T., Moncrieff, J., Moors, E., Munger, J. W., Pilegaard, K., Rannik, Ü., Rebmann, C., Suyker, A., Tenhunen, J., Tu, K., Verma, S., Vesala, T., Wilson, K., and Wofsy, S.: Gap filling strategies for defensible annual sums of net ecosystem exchange, *Agric. For. Meteorol.*, 107, 43–69, [https://doi.org/10.1016/S0168-1923\(00\)00225-2](https://doi.org/10.1016/S0168-1923(00)00225-2), 2001.
- Kormann, R., and Meixner, F.X.: An analytical footprint model for non-neutral stratification, *Bound.-Lay. Meteorol.*, 99, 207–224, <https://doi.org/10.1023/a:1018991015119>, 2001.
- Kutter, E., Yi, C. X., Hendrey, G., Liu, H. P., Eaton, T., and Ni-Meister, W.: Recirculation over complex terrain, *J. Geophys. Res. Atmos.*, 122, 6637–6651, <https://doi.org/10.1002/2016JD026409>, 2017.
- Lei, H. M., Gong, T. T., Zhang, Y. C., and Yang, D. W.: Biological factors dominate the interannual variability of evapotranspiration in an irrigated cropland in the North China Plain, *Agric. For. Meteorol.*, 250–251, 262–276, <https://doi.org/10.1016/j.agrformet.2018.01.007>, 2018.
- Li, G. P. (Eds.): *Dynamic meteorology of the Tibetan Plateau*, China Meteorological Press, Beijing, China, 97 pp., 2007.
- Li, L., Vuichard, N., Viovy, N., Ciais, P., Wang, T., Ceschia, E., Jans, W., Wattenbach, M., Béziat, P., Gruenwald, T., Lehuger, S., and Bernhofer, C.: Importance of crop varieties and management practices: evaluation of a process-based model

- for simulating CO<sub>2</sub> and H<sub>2</sub>O fluxes at five European maize (*Zea mays* L.) sites, *Biogeosciences*, 8, 1721–1736, <https://doi.org/10.5194/bg-8-1721-2011>, 2011.
- 115 Liu, H. P., Zhang, Q. Y., and Dowler, G.: Environmental controls on the surface energy budget over a large southern inland water in the United States: an analysis of one-year eddy covariance flux data, *J. Hydrometeor.*, 13, 1893–1910, <https://doi.org/10.1175/JHM-D-12-020.1>, 2012.
- Montagnani, L., Zanotelli, D., Tagliavini, M., and Tomelleri, E.: Timescale effects on the environmental control of carbon and water fluxes of an apple orchard, *Ecol. Evol.*, 8, 416–434, <https://doi.org/10.1002/ece3.3633>, 2018.
- 120 Qian, Z. A., and Jiao, Y. J.: Advances and problems on Qinghai-Xizang Plateau meteorological research, *Adv. Earth Sci.*, (in Chinese), 12, 207–216, 1997.
- Reichstein, M., Falge, E., Baldocchi, D., Papale, D., Aubinet, M., Berbigier, P., Bernhofer, C., Buchmann, N., Gilmanov, T., Granier, A., Grünwald, T., Havránková, K., Ilvesniemi, H., Janous, D., Knohl, A., Laurila, T., Lohila, A., Loustau, D., Matteucci, G., Meyers, T., Miglietta, F., Ourcival, J. M., Pumpanen, J., Rambal, S., Rotenberg, E., Sanz, M., Tenhunen, J., Seufert, G., Vaccari, F., Vesala, T., Yakir, D., and Valentini, R.: On the separation of net ecosystem exchange into assimilation and ecosystem respiration: Review and improved algorithm, *Glob. Change Biol.*, 11, 1424–1439, <https://doi.org/10.1111/j.1365-2486.2005.001002.x>, 2005.
- 125 Wang, Y., Zhou, L., Jia, Q. Y., and Oing, X. Y.: Direct and indirect effects of environmental factors on daily CO<sub>2</sub> exchange in a rainfed maize cropland-A SEM analysis with 10 year observations, *Field Crops Res.*, 242, 107591, <https://doi.org/10.1016/j.fcr.2019.107591>, 2019.
- 130 Wang, Y. J., Xu, X. D., Liu, H. Z., Li, Y. Q., Li, Y. H., Hu, Z. Y., Gao, X. Q., Mao, Y. M., Sun, J. H., Lenschow, D. H., Zhong, S. Y., Zhou, M. Y., Bian, X. D., and Zhao, P.: Analysis of land surface parameters and turbulence characteristics over the Tibetan Plateau and surrounding region, *J. Geophys. Res.*, 121, 9540–9560, <https://doi.org/10.1002/2016JD025401>, 2016.
- 135 Wang, Y. W., Luo, W. J., Zeng, G. N., Peng, H. J., Cheng, A. Y., Zhang, L., Cai, X. L., Chen, J., Lyu, Y. N., Yang, H. L., and Wang, S. J.: Characteristics of carbon, water, and energy fluxes on abandoned farmland revealed by critical zone observation in the karst region of southwest China, *Agric., Ecosyst. Environ.*, 292, 106821, <https://doi.org/10.1016/j.agee.2020.106821>, 2020.
- 140 Xin, Y. F., Chen, F., Zhao, P., Barlage, M., Blanken, P., Chen, Y. L., Chen, B., and Wang, Y. J.: Surface energy balance closure at ten sites over the Tibetan Plateau, *Agric. For. Meteorol.*, 259, 317–328, <https://doi.org/10.1016/j.agrformet.2018.05.007>, 2018.
- Xu, A. L., Zhao, X. H., Fu, Z. J., Liu, J. S., and Sun, J. H.: Comparison of meteorological elements over water and land surface in the Erhai Lake basin, *Trans. Atmos. Sci.*, (in Chinese), 34, 225–231, 2011.
- Xu, A. L., and Li, J.: An overview of the integrated meteorological observations in complex terrain region at Dali National Climate Observatory, China, *Atmosphere*, 11, 279, <https://doi.org/10.3390/atmos11030279>, 2020.
- 145 Xue, H. L., Li, J., Qian, T. T., and Gu, H. P.: A 100-m-scale modeling study of a gale event on the lee side of a long narrow mountain, *J. Appl. Meteorol. Climatol.*, 59, 23–45, <https://doi.org/10.1175/JAMc-D-190066.1>, 2020.
- Yusup, Y., and Liu, H. P.: Effects of atmospheric surface layer stability on turbulent fluxes of heat and water vapor across the water-atmosphere interface, *J. Hydrometeor.*, 17, 2835–2851, <https://doi.org/10.1175/JHM-D-16-0042.1>, 2016.
- 150 Yusup, Y., and Liu, H. P.: Effects of persistent wind speeds on turbulent fluxes in the water-atmosphere interface, *Theor. Appl. Climatol.* 140, 313–325, <https://doi.org/10.1007/s00704-019-03084-4>, 2020.
